# Supplementary material
Source: bioRxiv or medRxiv preprint supplement (http://medrxiv.org/highwire/filestream/91798/field_highwire_adjunct_files/0/2020.07.30.20165456-1.pdf)
Supplement: Supplementary file [file 2020.07.30.20165456-1.pdf]

## Authors

| Name                        | Location                                                                                                                                      | Contribution                                                                                                                        |
|-----------------------------|-----------------------------------------------------------------------------------------------------------------------------------------------|-------------------------------------------------------------------------------------------------------------------------------------|
| Kelly M. Sunderland, MSc    | Rotman Research Institute, Baycrest Health Sciences, Toronto, Canada                                                                          | Drafted the manuscript; Analyzed and interpreted data; Major role in acquisition of data - assessment platforms                     |
| Derek Beaton, PhD           | Rotman Research Institute, Baycrest Health Sciences, Toronto, Canada                                                                          | Analyzed and interpreted data; Major role in acquisition of data - assessment platforms; Revised the manuscript                     |
| Stephen R. Arnott, PhD      | Rotman Research Institute, Baycrest Health Sciences, Toronto, Canada                                                                          | Major role in acquisition of data - assessment platforms; Revised the manuscript                                                    |
| Peter Kleinstiver, PhD      | Schulich School of Medicine and Dentistry, Western University, London, Canada                                                                 | Designed and conceptualized ONDRI; Major role in acquisition of data – program manager; Revised the manuscript                      |
| Donna Kwan, PhD             | Centre for Neuroscience Studies, Queen's University, Kingston, Canada                                                                         | Major role in acquisition of data - assessment platforms; Revised the manuscript                                                    |
| Jane M. Lawrence-Dewar, PhD | Thunder Bay Regional Health Research Institute, Thunder Bay, Canada                                                                           | Major role in acquisition of data - participant recruitment; Revised the manuscript                                                 |
| Joel Ramirez, PhD           | Sunnybrook Research Institute, Sunnybrook Health Sciences Centre, Toronto, Canada                                                             | Major role in acquisition of data - assessment platforms; Revised the manuscript                                                    |
| Brian Tan, MSc              | Rotman Research Institute, Baycrest Health Sciences, Toronto, Canada                                                                          | Major role in acquisition of data - assessment platforms; Revised the manuscript                                                    |
| Robert Bartha, PhD          | Robarts Research Institute and Department of Medical Biophysics, Western University, London, Canada                                           | Designed and conceptualized ONDRI; Major role in acquisition of data - assessment platforms; Revised the manuscript                 |
| Sandra E. Black, MD         | Sunnybrook Research Institute, Sunnybrook Health Sciences Centre & Department of Medicine (Neurology), University of Toronto, Toronto, Canada | Designed and conceptualized ONDRI; Major role in acquisition of data - participant recruitment; Revised the manuscript; Assisted in |

|                          |                                                                                                                                                                |                                                                                                                        |
|--------------------------|----------------------------------------------------------------------------------------------------------------------------------------------------------------|------------------------------------------------------------------------------------------------------------------------|
|                          |                                                                                                                                                                | evaluation of MRI exclusionary findings in the AD/MCI cohort                                                           |
| Michael Borrie, MD       | St. Joseph's Health Care Centre & Schulich School of Medicine and Dentistry, Western University, London, Canada                                                | Designed and conceptualized ONDRI; Major role in acquisition of data - participant recruitment; Revised the manuscript |
| Donald Brien, MSc        | Centre for Neuroscience Studies, Queen's University, Kingston, Canada                                                                                          | Major role in acquisition of data - assessment platforms                                                               |
| Leanne K. Casaubon, MD   | Toronto Western Hospital & University of Toronto, Toronto, Canada                                                                                              | Major role in acquisition of data - participant recruitment                                                            |
| Brian C. Coe, PhD        | Centre for Neuroscience Studies, Queen's University, Kingston, Canada                                                                                          | Major role in acquisition of data - assessment platforms                                                               |
| Benjamin Cornish, MSc    | Department of Kinesiology, University of Waterloo, Waterloo, Canada                                                                                            | Major role in acquisition of data - assessment platforms; Revised the manuscript                                       |
| Allison A. Dilliot, BMSc | Department of Biochemistry, Schulich School of Medicine and Dentistry, and Robarts Research Institute, Western University, London, Canada                      | Major role in acquisition of data - assessment platforms; Revised the manuscript                                       |
| Dar Dowlatshahi, MD, PhD | Department of Medicine, University of Ottawa & Ottawa Hospital Research Institute, Ottawa, Canada                                                              | Major role in acquisition of data - participant recruitment                                                            |
| Elizabeth Finger, MD     | Department of Clinical Neurological Sciences, Schulich School of Medicine and Dentistry, Western University & Lawson Health Research Institute, London, Canada | Designed and conceptualized ONDRI; Major role in acquisition of data - participant recruitment                         |
| Corinne Fischer, MD      | Keenan Research Centre for Biomedical Research, Li Ka Shing Knowledge Institute, St. Michael's Hospital, Toronto, Canada                                       | Major role in acquisition of data - participant recruitment; Revised the manuscript                                    |
| Andrew Frank, MD         | Bruyère Research Institute & University of Ottawa, Ottawa, Canada                                                                                              | Major role in acquisition of data - participant recruitment                                                            |
| Julia Fraser, MSc        | Department of Kinesiology, University of Waterloo, Waterloo, Canada                                                                                            | Major role in acquisition of data - assessment platforms; Revised the manuscript                                       |
| Morris Freedman, MD      | Division of Neurology and Rotman Research Institute, Baycrest Health Sciences & Department of Medicine                                                         | Designed and conceptualized ONDRI; Major role in                                                                       |

|                         |                                                                                                                                                                              |                                                                                                                        |
|-------------------------|------------------------------------------------------------------------------------------------------------------------------------------------------------------------------|------------------------------------------------------------------------------------------------------------------------|
|                         | (Neurology), University of Toronto, Toronto, Canada                                                                                                                          | acquisition of data - participant recruitment                                                                          |
| Barry Greenberg, PhD    | Department of Neurology, Johns Hopkins University School of Medicine, Baltimore, USA                                                                                         | Designed and conceptualized ONDRI; Major role in acquisition of data - assessment platforms                            |
| David A. Grimes, MD     | The Ottawa Hospital & University of Ottawa, Ottawa, Canada                                                                                                                   | Designed and conceptualized ONDRI; Major role in acquisition of data - participant recruitment; Revised the manuscript |
| Ayman Hassan, MD        | Thunder Bay Regional Health Research Institute, Thunder Bay, Canada                                                                                                          | Major role in acquisition of data - participant recruitment                                                            |
| Wendy Hatch, OD         | Kensington Eye Institute & Department of Ophthalmology and Vision Sciences, University of Toronto, Toronto, Canada                                                           | Major role in acquisition of data - assessment platforms; Revised the manuscript                                       |
| Robert A. Hegele, MD    | Department of Biochemistry, Schulich School of Medicine and Dentistry, and Robarts Research Institute, Western University, London, Canada                                    | Designed and conceptualized ONDRI; Major role in acquisition of data - assessment platforms; Revised the manuscript    |
| Christopher Hudson, PhD | School of Optometry and Vision Science, University of Waterloo, Waterloo & Department of Ophthalmology and Vision Sciences, University of Toronto, Toronto, Canada           | Designed and conceptualized ONDRI; Major role in acquisition of data - assessment platforms; Revised the manuscript    |
| Mandar Jog, MD          | London Health Sciences Centre, London, Canada                                                                                                                                | Major role in acquisition of data - participant recruitment                                                            |
| Sanjeev Kumar, MD       | Campbell Family Mental Health Research Institute, Centre for Addiction and Mental Health & Department of Psychiatry, University of Toronto, Toronto, Canada                  | Major role in acquisition of data - participant recruitment; Revised the manuscript                                    |
| Anthony Lang, MD        | Edmond J Safra Program in Parkinson's Disease and the Morton and Gloria Shulman Movement Disorders Centre, Toronto Western Hospital & University of Toronto, Toronto, Canada | Designed and conceptualized ONDRI; Major role in acquisition of data - participant recruitment; Revised the manuscript |

|                                |                                                                                                                                                                              |                                                                                                                     |
|--------------------------------|------------------------------------------------------------------------------------------------------------------------------------------------------------------------------|---------------------------------------------------------------------------------------------------------------------|
| Brian Levine, PhD              | Rotman Research Institute, Baycrest Health Sciences & Departments of Psychology and Medicine (Neurology), University of Toronto, Toronto, Canada                             | Major role in acquisition of data - assessment platforms                                                            |
| Wendy Lou, PhD                 | Dalla Lana School of Public Health, University of Toronto, Toronto, Canada                                                                                                   | Major role in acquisition of data - assessment platforms                                                            |
| Jennifer Mandzia, MD, PhD      | Department of Clinical Neurological Sciences, London Health Sciences Centre & Western University, London, Canada                                                             | Major role in acquisition of data - participant recruitment                                                         |
| Connie Marras, MD, PhD         | Edmond J Safra Program in Parkinson's disease and the Morton and Gloria Shulman Movement Disorders Centre, Toronto Western Hospital & University of Toronto, Toronto, Canada | Major role in acquisition of data - participant recruitment; Revised the manuscript                                 |
| William McIlroy, PhD           | Department of Kinesiology, University of Waterloo, Waterloo, Canada                                                                                                          | Designed and conceptualized ONDRI; Major role in acquisition of data - assessment platforms                         |
| Manuel Montero-Odasso, MD, PhD | Schulich School of Medicine and Dentistry, Western University & Gait and Brain Lab, Parkwood Institute and Lawson Health Research Institute, London, Canada                  | Designed and conceptualized ONDRI; Major role in acquisition of data - assessment platforms                         |
| David G. Munoz, MD             | Keenan Research Centre for Biomedical Research, Li Ka Shing Knowledge Institute, St. Michael's Hospital & University of Toronto, Toronto, Canada                             | Designed and conceptualized ONDRI; Major role in acquisition of data - assessment platforms                         |
| Douglas P. Munoz, PhD          | Centre for Neuroscience Studies, Queen's University, Kingston, Canada                                                                                                        | Designed and conceptualized ONDRI; Major role in acquisition of data - assessment platforms; Revised the manuscript |
| Joseph B. Orange, PhD          | School of Communication Sciences and Disorders, Elborn College, Western University, London, Canada                                                                           | Designed and conceptualized ONDRI; Major role in acquisition of data - assessment platforms; Revised the manuscript |

|                                 |                                                                                                                                                                                                                            |                                                                                           |
|---------------------------------|----------------------------------------------------------------------------------------------------------------------------------------------------------------------------------------------------------------------------|-------------------------------------------------------------------------------------------|
| David S. Park, PhD              | Hotchkiss Brain Institute & Department of Clinical Neurosciences, University of Calgary, Calgary, Canada                                                                                                                   | Major role in acquisition of data<br>- participant recruitment                            |
| Stephen H. Pasternak, MD, PhD   | Cognitive Neurology and Alzheimer's Disease Research Centre, Parkwood Institute & St. Joseph's Health Care Centre, London, Canada                                                                                          | Major role in acquisition of data<br>- participant recruitment;<br>Revised the manuscript |
| Frederico Pieruccini-Faria, PhD | Schulich School of Medicine and Dentistry, Western University & Gait and Brain Lab, Parkwood Institute and Lawson Health Research Institute, London, Canada                                                                | Major role in acquisition of data<br>- assessment platforms; Revised the manuscript       |
| Tarek K. Rajji, MD              | Campbell Family Mental Health Research Institute, Centre for Addiction and Mental Health & Department of Psychiatry, University of Toronto, Toronto, Canada                                                                | Major role in acquisition of data<br>- participant recruitment;<br>Revised the manuscript |
| Angela C. Roberts, PhD          | Roxelyn and Richard Pepper Department of Communication Sciences and Disorders, Northwestern University, Evanston, USA & School of Communication Sciences and Disorders, Elborn College, Western University, London, Canada | Major role in acquisition of data<br>- assessment platforms; Revised the manuscript       |
| John F. Robinson                | Department of Biochemistry, Schulich School of Medicine and Dentistry, and Robarts Research Institute, Western University, London, Canada                                                                                  | Major role in acquisition of data<br>- assessment platforms                               |
| Ekaterina Rogaeva, PhD          | Tanz Centre for Research in Neurodegenerative Diseases, University of Toronto, Toronto, Canada                                                                                                                             | Major role in acquisition of data<br>- assessment platforms                               |
| Demetrios J. Sahlas, MD         | Department of Medicine, McMaster University, Hamilton, Canada                                                                                                                                                              | Major role in acquisition of data<br>- participant recruitment                            |
| Gustavo Saposnik, MD, PhD       | Li Ka Shing Knowledge Institute, St. Michael's Hospital & Department of Medicine (Neurology), University of Toronto, Toronto, Canada                                                                                       | Major role in acquisition of data<br>- participant recruitment                            |
| Christopher J.M. Scott, MSc     | Sunnybrook Research Institute, Sunnybrook Health Sciences Centre, Toronto, Canada                                                                                                                                          | Major role in acquisition of data<br>- assessment platforms; Revised the manuscript       |

|                                |                                                                                                                                                                                     |                                                                                                                                                                                      |
|--------------------------------|-------------------------------------------------------------------------------------------------------------------------------------------------------------------------------------|--------------------------------------------------------------------------------------------------------------------------------------------------------------------------------------|
| Dallas Seitz, MD, PHD          | Cumming School of Medicine,<br>University of Calgary, Calgary,<br>Canada                                                                                                            | Major role in acquisition of data<br>- participant recruitment                                                                                                                       |
| Christen Shoesmith, MD         | London Health Sciences Centre,<br>London, Canada                                                                                                                                    | Major role in acquisition of data<br>- participant recruitment                                                                                                                       |
| Thomas D.L. Steeves, MD        | Division of Neurology, St. Michael's<br>Hospital, Toronto, Canada                                                                                                                   | Major role in acquisition of data<br>- participant recruitment;<br>Revised the manuscript                                                                                            |
| Michael J. Strong, MD          | Canadian Institutes for Health<br>Research, Ottawa & Schulich School<br>of Medicine and Dentistry and<br>Robarts Research Institute, Western<br>University, London, Ontario, Canada | Designed and conceptualized<br>ONDRI                                                                                                                                                 |
| Stephen C. Strother, PhD       | Rotman Research Institute, Baycrest<br>Health Sciences & Department of<br>Medical Biophysics, University of<br>Toronto, Toronto, Canada                                             | Designed and conceptualized<br>ONDRI; Major role in<br>acquisition of data - assessment<br>platforms; Revised the<br>manuscript                                                      |
| Richard H. Swartz, MD,<br>PhD  | Sunnybrook Research Institute,<br>Sunnybrook Health Sciences Centre &<br>Department of Medicine (Neurology),<br>University of Toronto, Toronto,<br>Canada                           | Designed and conceptualized<br>ONDRI; Major role in<br>acquisition of data - participant<br>recruitment; Analyzed and<br>interpreted data; Revised the<br>manuscript                 |
| Sean Symons, MD                | Sunnybrook Research Institute,<br>Sunnybrook Health Sciences Centre &<br>Department of Medical Imaging,<br>University of Toronto, Toronto,<br>Canada                                | Designed and conceptualized<br>ONDRI; Major role in<br>acquisition of data - assessment<br>platforms; Assisted in<br>evaluation of MRI exclusionary<br>findings in the AD/MCI cohort |
| David F. Tang-Wai, MD          | Krembil Research Institute, Toronto<br>Western Hospital & Department of<br>Medicine (Neurology), University of<br>Toronto, Toronto, Canada                                          | Major role in acquisition of data<br>- participant recruitment;<br>Revised the manuscript                                                                                            |
| Maria Carmela Tartaglia,<br>MD | Tanz Centre for Research in<br>Neurodegenerative Diseases,<br>University of Toronto & Krembil<br>Research Institute, Toronto Western<br>Hospital, Toronto, Canada                   | Designed and conceptualized<br>ONDRI; Major role in<br>acquisition of data - participant<br>recruitment                                                                              |
| Angela K. Troyer, PhD          | Neuropsychology and Cognitive<br>Health, Baycrest Health Sciences &                                                                                                                 | Designed and conceptualized<br>ONDRI; Major role in<br>acquisition of data - assessment                                                                                              |

|                          |                                                                                                                                                                                                                                                                         |                                                                                                                                                    |
|--------------------------|-------------------------------------------------------------------------------------------------------------------------------------------------------------------------------------------------------------------------------------------------------------------------|----------------------------------------------------------------------------------------------------------------------------------------------------|
|                          | Department of Psychology, University of Toronto, Toronto, Canada                                                                                                                                                                                                        | platforms; Revised the manuscript                                                                                                                  |
| John Turnbull, MD, PhD   | Department of Medicine, McMaster University, Hamilton, Canada                                                                                                                                                                                                           | Major role in acquisition of data - participant recruitment                                                                                        |
| Lorne Zinman, MD         | Sunnybrook Research Institute, Sunnybrook Health Sciences Centre & Department of Medicine (Neurology), University of Toronto, Toronto, Canada                                                                                                                           | Designed and conceptualized ONDRI; Major role in acquisition of data - participant recruitment                                                     |
| Paula M. McLaughlin, PhD | Nova Scotia Health Authority and Dalhousie University, Halifax & Centre for Neuroscience Studies, Queen's University, Kingston, Canada                                                                                                                                  | Designed and conceptualized ONDRI; Major role in acquisition of data - assessment platforms; Analyzed and interpreted data; Revised the manuscript |
| Mario Masellis, MD, PhD  | Cognitive & Movement Disorders Clinic and L.C. Campbell Cognitive Neurology Research Unit, Hurvitz Brain Science Program, Sunnybrook Research Institute, Sunnybrook Health Sciences Centre & Department of Medicine (Neurology), University of Toronto, Toronto, Canada | Designed and conceptualized ONDRI; Major role in acquisition of data - participant recruitment; Revised the manuscript                             |
| Malcolm A. Binns, PhD    | Rotman Research Institute, Baycrest Health Sciences & Dalla Lana School of Public Health, University of Toronto, Toronto, Canada                                                                                                                                        | Major role in acquisition of data - assessment platforms; Analyzed and interpreted data; Revised the manuscript                                    |

## ONDRI Investigators

| <b>Name</b>                | <b>Location</b>                                                 | <b>Role</b>                     | <b>Contribution</b>                                                   |
|----------------------------|-----------------------------------------------------------------|---------------------------------|-----------------------------------------------------------------------|
| Agessandro Abrahao, MD     | Sunnybrook Health Sciences Centre, Toronto, Canada              | Associate Scientist             | Patient recruitment                                                   |
| Sabrina Adamo, HBSc        | Sunnybrook Health Sciences Centre, Toronto, Canada              | Imaging Analyst                 | Structural neuroimaging data processing                               |
| Courtney Berezuk, HBSc     | Sunnybrook Health Sciences Centre, Toronto, Canada              | Imaging Analyst                 | Structural neuroimaging data processing                               |
| Alanna Black, MSc          | Lawson Health Research Institute, London, Canada                | Lab Manager                     | Gait and balance platform administration                              |
| David Breen, MBChB, PhD    | Centre for Clinical Brain Sciences, The University of Edinburgh | Senior Clinical Research Fellow | Content discussions                                                   |
| Dennis Bulman, PhD         | Alberta Public Laboratories, Edmonton, Canada                   | Genomics Senior Investigator    | Genomics platform conceptualization and methodology                   |
| Ying Chen, PhD             | Queen's University, Kingston, Canada                            | Post-doctoral Fellow            | Content discussions                                                   |
| Sherif El-Defrawy, MD, PhD | Kensington Eye Institute, Toronto, Canada                       | Ophthalmology Investigator      | Retinal imaging protocol development                                  |
| Sali Farhan, PhD           | Harvard Medical School, Boston, USA                             | Genetics Investigator           | Genomics platform conceptualization and methodology                   |
| Mahdi Ghani, MD, PhD       | Department of Genetics, CHEO, Ottawa, Ontario, Canada           | Genetics Investigator           | Genomics platform conceptualization and methodology                   |
| John Gonder, MD            | Ivey Institute, London, Canada                                  | Ophthalmology Investigator      | Retinal imaging protocol development, supervision of data acquisition |
| Seyyed M.H. Haddad, PhD    | Western University, London, Canada                              | Research Associate              | Diffusion tensor imaging data processing and curation                 |
| Melissa Holmes, HBSc       | Sunnybrook Health Sciences Centre, Toronto, Canada              | Imaging Analyst                 | Structural neuroimaging data processing                               |
| Jeff Huang, BSc            | Queen's University, Kingston, Canada                            | Graduate Student                | Eye tracking data processing and curation                             |
| Elena Leontieva, PhD       | Kensington Eye Institute, Toronto, Canada                       | Post-doctoral Fellow            | Retinal imaging data processing and curation                          |
| Efrem Mandelcorn, MD       | University of Toronto, Toronto, Canada                          | Ophthalmology Investigator      | Retinal imaging protocol development, supervision of data acquisition |



|                             |                                                         |                                                       |                                                                           |
|-----------------------------|---------------------------------------------------------|-------------------------------------------------------|---------------------------------------------------------------------------|
| Edward Margolin, MD         | University of Toronto, Toronto, Canada                  | Ophthalmology Investigator                            | Retinal imaging protocol development, supervision of data acquisition     |
| Nuwan Nanayakkara, PhD      | Western University, London, Canada                      | Research Technologist                                 | Structural neuroimaging data preprocessing                                |
| Miracle Ozzoude, HBSc       | Sunnybrook Health Sciences Centre, Toronto, Canada      | Imaging Analyst                                       | Structural neuroimaging data processing and curation; Content discussions |
| Alicia J. Peltsch, PhD      | Queen's University                                      | Research Projects, Compliance, & Quality Control Lead | Neuropsychological data monitoring                                        |
| Bruce Pollock, MD, PhD      | Centre for Addiction and Mental Health, Toronto, Canada | Site Investigator                                     | Patient recruitment                                                       |
| Pradeep Raamana, PhD        | Baycrest Health Sciences, Toronto, Canada               | Post-doctoral Fellow                                  | Structural neuroimaging data processing; Content discussions              |
| Natalie Rashkovan, MHSc     | Sunnybrook Health Sciences Centre, Toronto, Canada      | Program Manager                                       | Study conceptualization and methodology                                   |
| Yanina Sarquis-Adamson, PhD | Lawson Health Research Institute, London, Canada        | Research Coordinator                                  | Gait and balance platform administration                                  |
| Alisia Southwell, HBSc      | Sunnybrook Health Sciences Centre, Toronto, Canada      | Research Coordinator                                  | Clinical and neuropsychological data curation; Content discussions        |
| Sujeevini Sujanthan, BSc    | Baycrest Health Sciences, Toronto, Canada               | Research Assistant                                    | Quality control verification                                              |
| Faryan Tayyari, PhD         | Kensington Eye Institute, Toronto, Canada               | Post-doctoral Fellow                                  | Retinal imaging data processing and curation; Content discussions         |
| Athena Theyers, MSc         | Baycrest Health Sciences, Toronto, Canada               | Research Assistant                                    | Functional neuroimaging data processing                                   |
| Abiramy Uthirakumaran, BSc  | Baycrest Health Sciences, Toronto, Canada               | Research Assistant                                    | Clinical data curation and quality control verification                   |
| Karen Van Ooteghem, PhD     | University of Waterloo, Waterloo, Canada                | Assistant Professor                                   | Study conceptualization and methodology                                   |
| Mojdeh Zamyadi, MSc         | Baycrest Health Sciences, Toronto, Canada               | Research Assistant                                    | Functional neuroimaging data processing and curation                      |
| Guangyong Zou, PhD          | Western University, London, Canada                      | Professor                                             | Study conceptualization and methodology                                   |
